# Supplementary material for: Bacterial Community Composition and Isolation of Actinobacteria from the Soil of Flaming Mountain in Xinjiang, China
Source: MDPI journal article supplement (doi:10.3390/microorganisms11020489), 2023-02-16
Supplement: s1 [file s1]

---

# Bacterial Community Composition and Isolation of Actinobacteria from the Soil of Flaming Mountain in Xinjiang, China

Zixuan He <sup>1,2,†</sup>, Yuxian Wang <sup>3,†</sup>, Xiaoyu Bai <sup>4</sup>, Min Chu <sup>2</sup>, Yuanyang Yi <sup>2,4</sup>, Jing Zhu <sup>2</sup>, Meiying Gu <sup>2</sup>, Ling Jiang <sup>3,\*</sup> and Zhidong Zhang <sup>1,2,3,\*</sup>

<sup>1</sup> College of Life Sciences and Technology, Xinjiang University, Urumqi 830046, China

<sup>2</sup> Institute of Microbiology, Xinjiang Academy of Agricultural Sciences/Xinjiang Key Laboratory of Special Environmental Microbiology, Urumqi 830091, China

<sup>3</sup> College of Food Science and Light Industry, State Key Laboratory of Materials-Oriented Chemical Engineering, Nanjing Tech University, Nanjing 211816, China

<sup>4</sup> College of Life Sciences, Xinjiang Normal University, Urumqi 830054, China

\* Correspondence: jiangling@njtech.edu.cn (L.J.); zhangzheedong@qq.com (Z.Z.)

† These authors contributed equally to this work.

\*Corresponding authors.

Ling Jiang, Email: jiangling@njtech.edu.cn

College of Food Science and Light Industry, State Key Laboratory of Materials-Oriented Chemical Engineering, Nanjing Tech University, Nanjing 211816, China.

Zhidong Zhang, Email: zhangzheedong@sohu.com

---

---

Xinjiang Key Laboratory of Special Environmental Microbiology, Institute of Microbiology, Xinjiang Academy of Agricultural Sciences, Urumqi 830091, China

**Supplementary Table S1.** A total of 11 media were prepared to isolate Actinobacteria.

| NO. | Medium               | Medium formulation                                                                                                                                                                                                                                                                                                                                                              |
|-----|----------------------|---------------------------------------------------------------------------------------------------------------------------------------------------------------------------------------------------------------------------------------------------------------------------------------------------------------------------------------------------------------------------------|
| 1   | GAUZE's Medium (g/L) | Starch soluble 20 g; KNO <sub>3</sub> 1 g; FeSO <sub>4</sub> · 7H <sub>2</sub> O 0.01 g;<br>MgSO <sub>4</sub> · 7H <sub>2</sub> O 0.5 g; Nacl 0.5 g; Agar 20 g ; H <sub>2</sub> O 1 L;<br>pH7.4-7.6                                                                                                                                                                             |
| 2   | M2 medium (g/L)      | Yeast Extract 4 g; Glucose 4 g; Malt extract powder<br>10 g; KNO <sub>3</sub> 1 g; FeSO <sub>4</sub> · 7H <sub>2</sub> O, 0.01 g; MgSO <sub>4</sub> ·<br>7H <sub>2</sub> O 0.5 g; Agar 20 g; H <sub>2</sub> O 1 L; pH7.8                                                                                                                                                        |
| 3   | M3 medium (g/L)      | Starch soluble 20 g; KNO <sub>3</sub> 2 g; k <sub>2</sub> HPO <sub>4</sub> 2 g; Cheesin 1<br>g; NaCl 2 g; FeSO <sub>4</sub> · 7H <sub>2</sub> O, 0.01 g; MgSO <sub>4</sub> · 7H <sub>2</sub> O<br>0.5 g; CaCO <sub>3</sub> 0.02 g; Agar 20 g; H <sub>2</sub> O 1 L                                                                                                              |
| 4   | M6 medium (g/L)      | Shrimp Shell 2 g; Humic acid 1 g; Na <sub>2</sub> HPO <sub>4</sub> 0.5 g;<br>MgSO <sub>4</sub> ·7H <sub>2</sub> O 0.5 g; FeSO <sub>4</sub> · 7H <sub>2</sub> O, 0.01 g; KCl 1.7<br>g; CaCO <sub>3</sub> 0.02 g; VB liquor (VB1 0.1 g ; Riboflavin<br>0.1 g; Niacin 0.1 g; VB <sub>6</sub> 0.1 g; Inositol 0.1 g;<br>Pantothenic acid 0.1g) 1ml; Agar 20 g; H <sub>2</sub> O 1 L |
| 5   | M9 medium (g/L)      | His 0.1 g ; KCl 1.7 g; D-Raffinose pentahydrate 1 g;<br>FeSO <sub>4</sub> · 7H <sub>2</sub> O, 0.01 g; MgSO <sub>4</sub> · 7H <sub>2</sub> O 0.5 g; CaCO <sub>3</sub><br>0.02 g; Agar 20 g; H <sub>2</sub> O 1 L                                                                                                                                                                |

---

|    |                  |                                                                                                                                                                                                                                                                                                                                                                                                                                                                                                                        |
|----|------------------|------------------------------------------------------------------------------------------------------------------------------------------------------------------------------------------------------------------------------------------------------------------------------------------------------------------------------------------------------------------------------------------------------------------------------------------------------------------------------------------------------------------------|
| 6  | 214 medium (g/L) | Yeast Extract 4 g; Glucose 4 g; Malt extract powder 10 g; CaCO <sub>3</sub> 2 g; Starch soluble 20 g; Agar 20 g; H <sub>2</sub> O 1 L                                                                                                                                                                                                                                                                                                                                                                                  |
| 7  | R2A medium (g/L) | Yeast Extract 0.5 g; Peptone 0.5; Casein hydrolysate 0.5 g; Glucose 4 g; Starch soluble 0.5 g; Dipotassium hydrogen phosphate 0.3 g; Anhydrous magnesium sulfate 0.024 g; Sodium pyruvate 0.3 g; Agar 20 g; H <sub>2</sub> O 1 L; pH7.2 ±0.2                                                                                                                                                                                                                                                                           |
| 8  | 656 medium (g/L) | Soluble starch 15 g; Yeast extract 4 g; K <sub>2</sub> HPO <sub>4</sub> 0.5 g; MgSO <sub>4</sub> ·7H <sub>2</sub> O 0.5 g; Agar 15 g; H <sub>2</sub> O 1 L; pH 7.4                                                                                                                                                                                                                                                                                                                                                     |
| 9  | SSY medium (g/L) | Yeast Extract 6 g; Glucose 5 g; KH <sub>2</sub> PO <sub>4</sub> 3g; MgSO <sub>4</sub> ·7H <sub>2</sub> O 0.5 g; CaCl <sub>2</sub> ·2H <sub>2</sub> O 0.25 g; (NH <sub>4</sub> ) <sub>2</sub> SO <sub>4</sub> 0.2 g; Trace elements(CaCl <sub>2</sub> · 2H <sub>2</sub> O 0.66 g; CoCl <sub>2</sub> •6H <sub>2</sub> O 0.18 g; CuSO <sub>4</sub> ·5H <sub>2</sub> O 0.16 g; H <sub>3</sub> BO <sub>3</sub> 0.1 g) 1 mL; Agar 20 g; H <sub>2</sub> O 1 L                                                                 |
| 10 | MA medium (g/L)  | Peptone 5 g; Yeast Extract 1 g; Nacl 19.45 g; MgCl <sub>2</sub> 5.98 g; Na <sub>2</sub> SO <sub>4</sub> 3.24 g; C <sub>6</sub> H <sub>5</sub> FeO <sub>7</sub> 0.1 g; Cacl <sub>2</sub> 1.8; KCl 0.55 g; Na <sub>2</sub> CO <sub>3</sub> 0.16 g; KBr 0.08 g; SrCl <sub>2</sub> 0.034 g; H <sub>3</sub> BO <sub>3</sub> 0.022 g; Na <sub>2</sub> O·nSiO <sub>2</sub> 0.004 g; NaF 0.0024 g; NH <sub>4</sub> NO <sub>3</sub> 0.0016 g; Na <sub>2</sub> HPO <sub>4</sub> 0.008 g; Agar 20 g; H <sub>2</sub> O 1 L; pH 7.6 |
| 11 | GSM medium (g/L) | Glucose 4 g; Yeast extract 4g; Malt extract 10 g; CaCO <sub>3</sub> 2 g; H <sub>2</sub> O 1 L; Agar 20g; pH 7.2                                                                                                                                                                                                                                                                                                                                                                                                        |

---
